# Supplementary material for: The Prognostic Role of Body Mass Index on Oncological Outcomes of Upper Tract Urothelial Carcinoma
Source: Cancers (Basel). 2023 Nov 10;15(22):5364. doi: 10.3390/cancers15225364 (PMC10670636; doi:10.3390/cancers15225364)
Supplement: Supplementary file 1 [file cancers-15-05364-s001.zip › Supplementary Table S1.xlsx]

## Sheet: Sheet1
	Supplementary Table S1. Baseline characteristics between the two BMI groups after PSM.
	Characteristics	Normal Weight N = 214 n (%)	Overweight/Obese N = 214 n (%)	Total N = 428 n (%)	p-value
	Age
	<70	73 (34.1)	78 (36.4)	151 (35.3)	0.588
	≥70	141 (65.9)	135 (63.1)	276 (64.5)
	Missing	0	1 (0.5)	1 (0.2)
	Gender
	Female	61 (28.5)	66 (30.8)	127 (29.7)	0.597
	Male	153 (71.5)	148 (69.2)	301 (70.3)
	Missing	0 (0.0)	0 (0.0)	0 (0.0)
	Smoking status
	No	57 (26.6)	77 (36.0)	134 (31.3)	0.159
	Ex-smoker	77 (36.0)	66 (30.8)	143 (33.4)
	Current smoker	63 (29.4)	62 (29.0)	125 (29.2)
	Missing	17 (8.0)	9 (4.2)	26 (6.1)
	Ethnicity
	White	177 (82.7)	177 (82.7)	177 (41.4)	>0.999
	Asian	30 (14.0)	30 (14.0)	30 (7.0)
	Other	7 (3.3)	7 (3.3)	7 (1.6)
	Missing	0 (0.0)	0 (0.0)	0 (0.0)
	Previous Malignancies
	No	136 (63.6)	143 (66.8)	279 (65.2)	0.476
	Yes	77 (36.0)	70 (32.7)	147 (34.3)
	Missing	1 (0.4)	1 (0.5)	2 (0.5)
	Occupational Hazard
	No	180 (84.1)	177 (82.7)	357 (83.4)	0.543
	Yes	4 (1.9)	6 (2.8)	10 (2.3)
	Missing	30 (14.0)	31 (14.5)	61 (14.3)
	Family history
	No	161 (75.2)	165 (77.1)	326 (76.2)	0.95
	Yes	14 (6.5)	14 (6.5)	28 (6.5)
	Missing	39 (18.2)	35 (16.4)	74 (17.3)
	ASA
	Ⅰ-Ⅱ	124 (57.9)	120 (56.1)	244 (57.0)	0.696
	Ⅲ-Ⅴ	90 (42.1)	94 (43.9)	184 (43.0)
	Missing	0 (0.0)	0 (0.0)	0 (0.0)
	Charlson Comorbidity Index
	0	70 (32.7)	73 (34.1)	143 (33.4)	0.19
	1-2	76 (35.5)	90 (42.1)	166 (38.8)
	3-4	43 (20.1)	34 (15.9)	77 (18.0)
	5-10	17 (7.9)	9 (4.2)	26 (6.1)
	Missing	8 (3.8)	8 (3.7)	16 (3.7)
	Procedure
	RNU	150 (70.1)	145 (67.8)	295 (69.0)	0.511
	KSS	11 (5.1)	14 (6.5)	25 (5.8)
	Missing	53 (24.8)	55 (25.7)	108 (25.2)
	Surgical Margin
	Negative	143 (66.8)	139 (65.0)	282 (65.9)	0.688
	Positive	16 (7.5)	18 (8.4)	34 (7.9)
	Missing	55 (25.7)	57 (26.6)	112 (26.2)
	Tumour Size
	<1cm	17 (7.9)	24 (11.2)	41 (9.6)	0.102
	1-2cm	65 (30.3)	48 (22.5)	113 (26.4)
	>2cm	34 (15.9)	36 (16.8)	70 (16.4)
	Missing	98 (45.9)	106 (49.5)	204 (47.7)
	TNM (2009) Staging - Left and Right
	pTa	85 (39.7)	88 (41.1)	173 (40.4)	0.919
	pTis	1 (0.5)	2 (0.9)	3 (0.7)
	pT1	40 (18.7)	40 (18.7)	80 (18.7)
	pT2	34 (15.9)	38 (17.8)	72 (16.8)
	pT3	52 (24.3)	45 (21.0)	97 (22.7)
	pT4	2 (0.9)	1 (0.5)	3 (0.7)
	Missing	0 (0.0)	0 (0.0)	0 (0.0)
	Tumor Grade
	G1	51 (23.8)	57 (26.6)	108 (25.2)	0.616
	G2	59 (27.6)	63 (29.4)	122 (28.5)
	G3	104 (48.6)	94 (43.9)	198 (46.3)
	Missing	0 (0.0)	0 (0.0)	0 (0.0)
	Multifocal Tumor
	No	169 (79.0)	167 (78.0)	336 (78.5)	0.814
	Yes	45 (21.0)	47 (22.0)	92 (21.5)
	Missing	0 (0.0)	0 (0.0)	0 (0.0)
	Comorbidities
	Diabetes	36 (16.8)	39 (18.2)	75 (17.5)	0.703
	Renal disease	39 (18.2)	32 (15.0)	71 (16.6)	0.363
	Liver disease	7 (3.3)	5 (2.3)	12 (2.8)	0.558
	Congestive heart failure	7 (3.3)	12 (5.6)	19 (4.4)	0.241
	Myocardial infarction	27 (12.6)	26 (12.1)	53 (12.4)	0.883
	Chronic pulmonary disease	38 (17.8)	42 (19.6)	80 (18.7)	0.62
	Cerebrovascular disease	13 (6.1)	14 (6.5)	27 (6.3)	0.842
	Peripheral vascular disease	25 (11.7)	21 (9.8)	46 (10.7)	0.532
	Ulcer disease	4 (1.9)	11 (5.1)	15 (3.5)	0.066
	Dementia	12 (5.6)	12 (5.6)	24 (5.6)	>0.999
	Hemiplegia	0 (0.0)	0 (0.0)	0 (0.0)	——
	Connective tissue disease	2 (0.9)	4 (1.9)	6 (1.4)	0.685
	AIDS	2 (0.9)	0 (0.0)	2 (0.5)	0.499
	All-Cause Mortality	24 (11.2)	19 (8.9)	43 (10.0)	0.421
	Cancer-specific Mortality	15 (7.0)	10 (4.7)	25 (5.8)	0.303
	Recurrence - UTUC and Bladder	65 (30.4)	39 (18.2)	104 (24.3)	0.003
	Recurrence of UTUC	26 (12.1)	17 (7.9)	43 (10.0)	0.148
	Recurrence of Bladder	46 (21.5)	27 (12.6)	73 (17.1)	0.015
	ASA: American Society of Anaesthesiologists; RNU: Radical nephroureterectomy; KSS: Kidney-sparing surgery.
