# Supplementary material for: The Prognostic Role of Body Mass Index on Oncological Outcomes of Upper Tract Urothelial Carcinoma
Source: Cancers (Basel). 2023 Nov 10;15(22):5364. doi: 10.3390/cancers15225364 (PMC10670636; doi:10.3390/cancers15225364)
Supplement: Supplementary file 1 [file cancers-15-05364-s001.zip › Supplementary Table S2.xlsx]

## Sheet: Sheet1
	Supplementary Table S2. Univariable and Multivariable Cox Regression Analysis.
	Characteristics	OS			CSS			RFS
		Univariable	Multivariable		Univariable	Multivariable		Univariable	Multivariable
	BMI
	Normal Weight	Ref	Ref		Ref	Ref		Ref	Ref
	Overweight/Obese	0.674 (0.460-0.986)	0.913 (0.490-1.703)		0.605 (0.366-1.000)	0.820 (0.383-1.754)		0.844 (0.666-1.068)	0.603 (0.403-0.901)
	Age
	<70	Ref	Ref		Ref	Ref		Ref
	≥70	2.713 (1.732-4.249)	1.890 (0.878-4.072)		2.335 (1.319-4.131)	2.511 (0.903-6.979)		1.192 (0.940-1.512)
	Gender
	Female	Ref			Ref			Ref
	Male	1.368 (0.873-2.144)			0.934 (0.542-1.607)			0.970 (0.751-1.252)
	Smoking status
	No	Ref	Ref		Ref			Ref
	Ex-smoker	1.006 (0.648-1.560)	1.076 (0.545-2.121)		1.192 (0.665-2.137)			1.207 (0.904-1.613)
	Current smoker	0.517 (0.295-0.908)	0.658 (0.259-1.673)		0.502 (0.228-1.103)			1.067 (0.779-1.461)
	Ethnicity
	White	Ref			Ref			Ref	Ref
	Asian	0.728 (0.389-1.363)			0.548 (0.219-1.371)			0.651 (0.442-0.957)	0.845 (0.477-1.497)
	Other	0.728 (0.267-1.986)			0.308 (0.042-2.227)			0.661 (0.351-1.246)	0.363 (0.049-2.685)
	Previous Malignancies
	No	Ref			Ref			Ref	Ref
	Yes	1.095 (0.733-1.634）			0.657 (0.367-1.178)			1.310 (1.029-1.667)	0.741 (0.480-1.145)
	Occupational Hazard
	No	Ref			Ref			Ref
	Yes	0.889 (0.218-3.619)			0.756 (0.104-5.482)			1.358 (0.670-2.749)
	Family history
	No	Ref			Ref			Ref
	Yes	0.577 (0.233-1.432)			0.404 (0.097-1.670)			1.092 (0.714-1.672)
	ASA
	Ⅰ-Ⅱ	Ref	Ref		Ref	Ref		Ref
	Ⅲ-Ⅴ	2.199 (1.495-3.234)	1.707 (0.829-3.518)		1.840 (1.104-3.066)	1.708 (0.683-4.272)		1.189 (0.934-1.515)
	Charlson Comorbidity Index
	0	Ref	Ref		Ref			Ref	Ref
	1-2	1.264 (0.719-2.224)	1.300 (0.548-3.084)		1.147 (0.557-2.363)			0.954 (0.675-1.347)	0.752 (0.453-1.250)
	3-4	1.776 (0.954-3.304)	1.790 (0.652-4.912)		1.208 (0.509-2.869)			1.676 (1.155-2.433)	0.911 (0.492-1.685)
	5-10	3.172 (1.587-6.340)	1.168 (0.302-4.509)		2.432 (0.955-6.189)			1.813 (1.097-2.997)	1.126 (0.481-2.635)
	Procedure
	RNU	Ref			Ref			Ref	Ref
	KSS	0.722 (0.291-1.790)			0.458 (0.111-1.890)			1.881 (1.224-2.892)	1.121 (0.509-2.468)
	Surgical Margin
	Negative	Ref	Ref		Ref	Ref		Ref	Ref
	Positive	2.720 (1.458-5.077)	1.966 (0.828-4.664)		2.909 (1.348-6.273)	2.198 (0.795-6.075)		1.706 (1.058-2.751)	1.571 (0.871-2.835)
	Tumour Size
	<1cm	Ref			Ref			Ref
	1-2cm	1.004 (0.330-3.050)			0.287 (0.072-1.147)			1.358 (0.842-2.188)
	>2cm	1.949 (0.640-5.937）			1.444 (0.451-4.624)			1.146 (0.672-1.955)
	TNM (2009) Staging - Left and Right
	pTa	Ref	Ref		Ref	Ref		Ref	Ref
	pTis	4.241 (1.196-15.039)	2.709 (0.264-27.761)		11.160 (1.864-66.833)	10.760 (0.552->100)		0.799 (0.325-1.963)	1.081 (0.138-8.497)
	pT1	1.441 (0.606-3.426)	1.080 (0.280-4.166)		1.312 (0.219-7.860)	0.902 (0.050-16.194)		0.793 (0.560-1.122)	1.435 (0.774-2.663)
	pT2	2.985 (1.411-6.316)	1.879 (0.538-6.567)		8.231 (2.295-29.526)	5.562 (0.613-50.439)		0.698 (0.478-1.018)	1.207 (0.623-2.341)
	pT3	4.826 (2.517-9.252)	2.950 (0.919-9.470)		14.793 (4.498-48.646)	9.496 (1.039-86.783)		0.642 (0.457-0.902)	1.625 (0.870-3.036)
	pT4	8.614 (3.028-24.505)	3.285 (0.453-23.836)		13.653 (2.277-81.841)	<0.001 (<0.001->100)		0.913 (0.372-2.244)	2.550 (0.691-9.417)
	Tumor Grade
	G1	Ref	Ref		Ref	Ref		Ref	Ref
	G2	0.949 (0.425-2.119)	1.616 (0.186-13.998)		0.476 (0.114-1.992)	<0.001 (<0.001->100)		1.068 (0.762-1.497)	1.141 (0.583-2.233)
	G3	2.572 (1.348-4.908)	3.872 (0.468-32.018)		4.049 (1.600-10.250)	1.117 (0.212-5.900)		0.703 (0.511-0.968)	0.706 (0.350-1.426)
	Multifocal Tumor
	No	Ref	Ref		Ref	Ref		Ref	Ref
	Yes	1.957 (1.268-3.022)	0.968 (0.496-1.888)		2.381 (1.378-4.115)	0.946 (0.403-2.219)		1.471 (1.110-1.949)	1.641 (1.057-2.547)
	Comorbidities (Yes vs. No)
	Diabetes	1.968 (1.263-3.065)	1.112 (0.543-2.278)		2.293 (1.273-4.131)	1.541 (0.672-3.537)		1.309 (0.970-1.766)
	Renal disease	1.520 (0.930-2.485)			1.803 (0.951-3.417)			1.100 (0.783-1.544)
	Liver disease	0.908 (0.223-3.695)			0.838 (0.115-6.079)			1.357 (0.602-3.055)
	Congestive heart failure	1.695 (0.818-3.513)			0.372 (0.051-2.698)			1.175 (0.695-1.988)
	Myocardial infarction	1.847 (1.098-3.106)	1.739 (0.818-3.698)		2.113 (1.074-4.157)	1.988 (0.777-5.088)		1.859 (1.335-2.588)	2.441 (1.459-4.083)
	Chronic pulmonary disease	0.945 (0.533-1.676)			0.741 (0.314-1.747)			0.851 (0.588-1.232)
	Cerebrovascular disease	1.542 (0.772-3.079)			0.572 (0.139-2.360)			0.847 (0.493-1.456)
	Peripheral vascular disease	1.562 (0.882-2.769)			0.966 (0.382-2.442)			0.990 (0.648-1.512)
	Ulcer disease	0.860 (0.211-3.496)			0.789 (0.109-5.722)			0.314 (0.078-1.264)
	Dementia	2.291 (0.831-6.314)			1.080 (0.148-7.890)			0.979 (0.434-2.211)
	Hemiplegia	0.049 (<0.001->100)			0.049 (<0.001->100)			0.932 (0.131-6.651)
	Connective tissue disease	2.068 (0.652-6.558)			1.159 (0.160-8.422)			0.776 (0.248-2.429)
	AIDS	0.049 (<0.001->100)			0.049 (<0.001->100)			1.703 (0.238-12.176)
	ASA: American Society of Anaesthesiologists; RNU: Radical nephroureterectomy; KSS: Kidney-sparing surgery.
