# Supplementary figures and images for: The Prognostic Role of Body Mass Index on Oncological Outcomes of Upper Tract Urothelial Carcinoma
Source: MDPI journal article supplement (doi:10.3390/cancers15225364), 2023-11-10

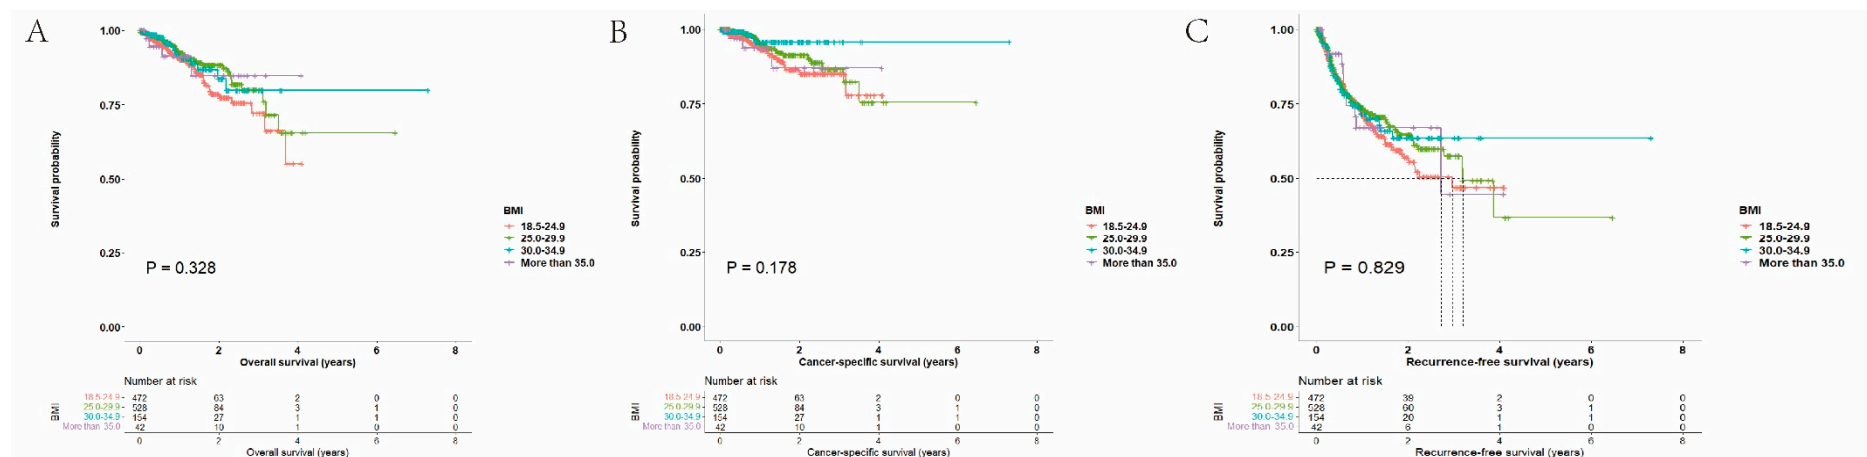

Supplementary Figure S1. Survival outcomes of subgroups. (A) OS, (B) CSS, (C) RFS.

Supplement: s1 [file s1]
